# Supplementary material
Source: PubMed Central journal article supplement (PMC8204403)
Supplement: NIHMS1686001-supplement-1.pdf [file NIHMS1686001-supplement-1.pdf]

**Supporting Information Table ST1.** Classification results for combined group D2AB,high, consisting of all D2B,high spectra plus 10 non-outlier D2A,high spectra. The D2A,high spectra, which are uniformly sampled, were first resampled according to D2B,high sampling schedules using the nusCompress utility in NMRPipe.[38] This resampling procedure deletes or sets to zero the subset of data not included in the non-uniform sampling schedule, such that the resampled data can be treated as NUS data, and reprocessed to correspond to the D2B,high data according to the processing protocols used for the interlaboratory study.[2] The outlier detection threshold for this case is  $D_{i,k} > 1.27$  at the 95% confidence limit.

| Index | Spectrum Study Title         | Inter active Score | $D_{i,k}$ | Z Score  | Outlier, Recursive Method | Notes                                                         |
|-------|------------------------------|--------------------|-----------|----------|---------------------------|---------------------------------------------------------------|
| 211   | 211-D2B-S-N-800-6211-403-37C | 2                  | 4.22      | 20638.25 | YES                       |                                                               |
| 208   | 208-D2B-S-N-800-2461-103-37C | 1                  | 3.42      | 4817.43  | YES                       |                                                               |
| 224   | 224-D2B-S-N-800-7244-015-37C | 2                  | 3.01      | 2009.95  | YES                       |                                                               |
| 212   | 212-D2B-S-N-800-6211-405-37C | 2                  | 1.82      | 60.48    | YES                       |                                                               |
| 219   | 219-D2B-S-N-800-6272-005-37C | 0                  | 1.52      | 17.43    | NO                        | Above outlier threshold, but not within 15% outlier fraction. |
| 215   | 215-D2B-S-N-800-6211-409-37C | 1                  | 1.36      | 8.02     | NO                        | Above outlier threshold, but not within 15% outlier fraction. |
| 213   | 213-D2B-S-N-800-6211-406-37C | 0                  | 1.14      | 2.45     | NO                        |                                                               |
| 204   | 204-D2B-S-N-800-2146-003-37C | 0                  | 1.13      | 2.27     | NO                        |                                                               |
| 2     | 002-D2A-S-U-900-7425-010-37C | 0                  | 1.03      | 1.18     | NO                        |                                                               |
| 5     | 005-D2A-S-U-900-8495-010-37C | 0                  | 1.03      | 1.16     | NO                        |                                                               |
| 182   | 182-D2B-S-N-900-8495-011-37C | 0                  | 1.02      | 1.14     | NO                        |                                                               |
| 196   | 196-D2B-S-N-850-5487-003-37C | 0                  | 0.98      | 0.86     | NO                        |                                                               |
| 45    | 045-D2A-S-U-800-7425-002-37C | 0                  | 0.97      | 0.78     | NO                        |                                                               |
| 37    | 037-D2A-S-U-800-6272-003-37C | 0                  | 0.95      | 0.67     | NO                        |                                                               |
| 9     | 009-D2A-S-U-900-8822-008-37C | 0                  | 0.94      | 0.62     | NO                        |                                                               |
| 19    | 019-D2A-S-U-850-5487-002-37C | 0                  | 0.93      | 0.58     | NO                        |                                                               |
| 188   | 188-D2B-S-N-900-8822-009-37C | 0                  | 0.93      | 0.58     | NO                        |                                                               |
| 34    | 034-D2A-S-U-800-6211-402-37C | 0                  | 0.92      | 0.55     | NO                        |                                                               |
| 228   | 228-D2B-S-N-800-7425-003-37C | 0                  | 0.91      | 0.51     | NO                        |                                                               |
| 22    | 022-D2A-S-U-850-6324-004-37C | 0                  | 0.91      | 0.51     | NO                        |                                                               |
| 38    | 038-D2A-S-U-800-6272-004-37C | 0                  | 0.89      | 0.44     | NO                        |                                                               |
| 178   | 178-D2B-S-N-900-7425-011-37C | 0                  | 0.88      | 0.4      | NO                        |                                                               |
| 28    | 028-D2A-S-U-800-2146-002-37C | 0                  | 0.86      | 0.34     | NO                        |                                                               |

**Supporting Information Table ST2.** Classification results for combined group D2CE,mid, with all spectra from group D2E,mid, and all spectra from group D2C,mid that were resampled and reprocessed as described in table ST1 to match the D2E,mid NUS protocol. The outlier detection threshold for this case is  $D_{i,k} > 0.88$  at the 95% confidence limit.

| Index | Spectrum Study Title         | Interactive Score | $D_{i,k}$ | Z Score | Outlier, Recursive Method |
|-------|------------------------------|-------------------|-----------|---------|---------------------------|
| 78    | 078-D2C-S-U-700-9516-004-37C | 0                 | 0.87      | 4.96    | No                        |
| 49    | 049-D2C-S-U-750-2974-004-37C | 0                 | 0.86      | 4.64    | No                        |
| 234   | 234-D2E-S-N-750-2974-006-37C | 0                 | 0.76      | 2.68    | No                        |
| 68    | 068-D2C-S-U-700-8473-004-37C | 0                 | 0.74      | 2.41    | No                        |
| 253   | 253-D2E-S-N-700-4233-106-37C | 0                 | 0.67      | 1.49    | No                        |
| 52    | 052-D2C-S-U-750-5417-114-37C | 0                 | 0.61      | 1.03    | No                        |
| 268   | 268-D2E-S-N-700-8473-006-37C | 0                 | 0.59      | 0.89    | No                        |
| 59    | 059-D2C-S-U-700-4233-104-37C | 0                 | 0.57      | 0.72    | No                        |
| 238   | 238-D2E-S-N-750-5417-116-37C | 0                 | 0.56      | 0.67    | No                        |
| 73    | 073-D2C-S-U-700-8495-006-37C | 0                 | 0.53      | 0.53    | No                        |
| 243   | 243-D2E-S-N-700-9516-006-37C | 0                 | 0.5       | 0.42    | No                        |
| 249   | 249-D2E-S-N-700-8495-008-37C | 0                 | 0.43      | 0.22    | No                        |
| 75    | 075-D2C-S-U-700-8543-004-37C | 0                 | 0.43      | 0.21    | No                        |

**System Suitability Sample Heavy Chain, 232 Residues**

EAEAQVTLRE SGPALVKPTQ TLTLTCTFSG FSLSTAGMSV GWIRQPPGKA LEWLADIWWD  
DKKHYNPSLK DRLTISKDTS KNQVVLKVTN MDPADTATYY CARDMIFNFY FDVWGQGTTV  
TVSSASTKGP SVFPLAPSSK STSGGTAALG CLVKDYFPEP VTVSWNSGAL TSGVHTFPAV  
LQSSGLYSL SVVTVPSSSL GTQTYICNVN HKPSNTKVDK RVEPKSCDKT H

**System Suitability Sample Light Chain, 218 residues**

EAEAADIQMTQ SPSTLSASVG DRVTITCSAS SRVGYMHWYQ QKPGKAPKLL IYDTSKLAGS  
VPSRFGSGS GTEFTLTISS LQPDDFATYY CFQGSQYPFT FGGGTKVEIK RTVAAPSVFI  
FPPSDEQLKS GTASVCLLN NFYPREAKVQ WKVDNALQSG NSQESVTEQD SKDSTYSLSS  
TLTSLKADYE KHKVYACEVT HQLSSPVTK SFNRGEC

**Supporting Information Figure S1.** Amino acid sequences of Fab domain light and heavy chains of the NISTmAb Interlaboratory NMR Study samples. The sequences given here are for the “System Suitability Sample” construct, which is identical to the “NIST-Fab” sequence, but includes four additional amino acids EAEA at the N-terminus of each chain.

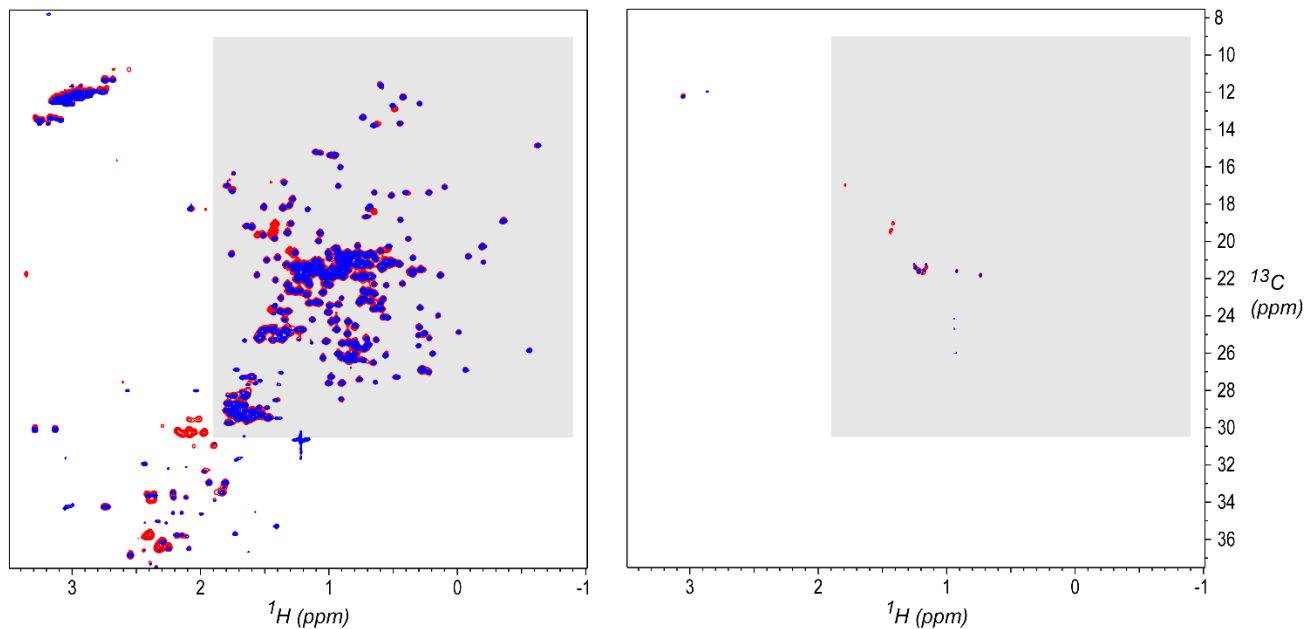

**Supporting Information Figure S2.**  $^1\text{H}$ ,  $^{13}\text{C}$  gHSQC[33] spectral overlay for a System Suitability Sample (red, D2C-S-U-900-8822-010-37C) and a NIST-Fab sample (blue, D3A-F-U-900-7425-015-37C). [2] Contour levels start at 2.5% of maximum intensity (left) and 35% of maximum intensity (right). The region shaded in gray was used for the outlier analysis in the present work ( $^1\text{H}$  1.9 ppm to -0.9 ppm,  $^{13}\text{C}$  30.5 ppm to 9.0 ppm). As seen in the plot on the right, the majority of signals are below the 35% threshold.

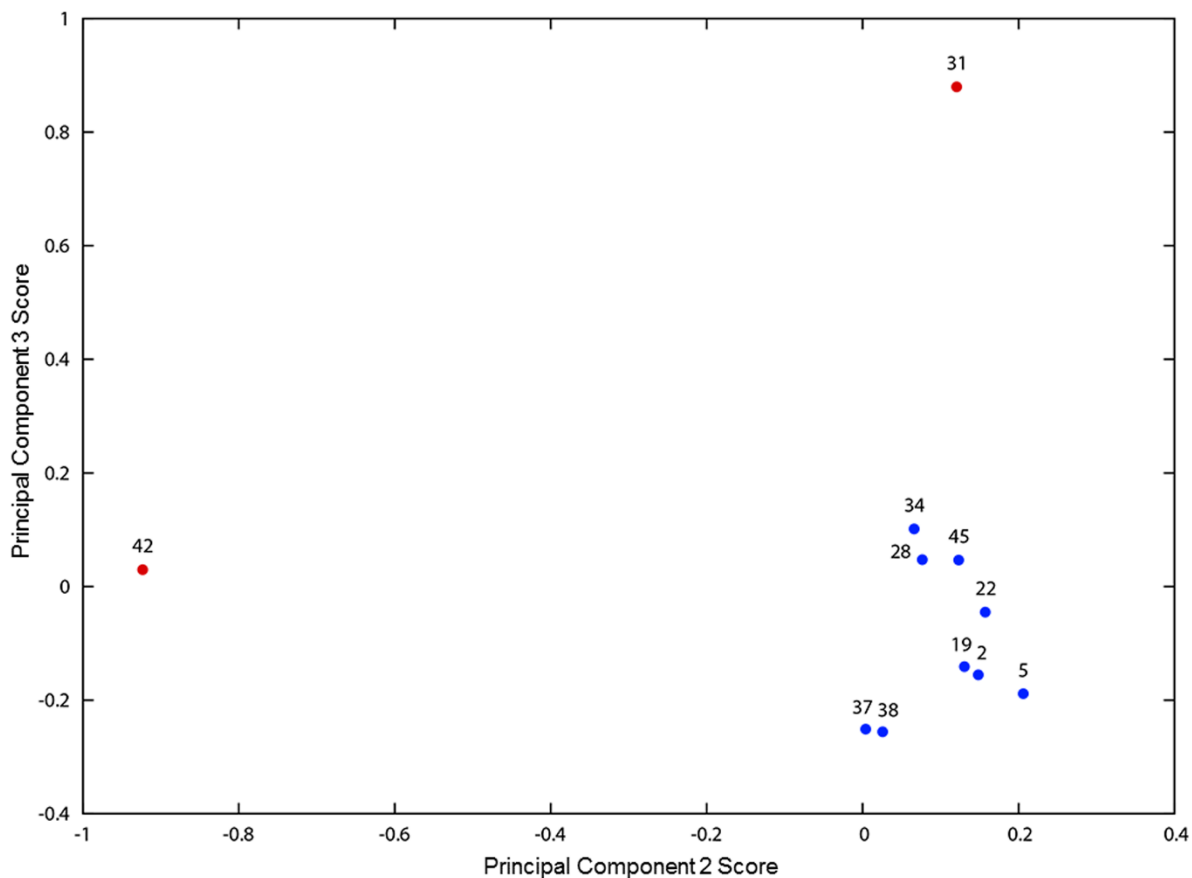

**Supporting Information Figure S3.** PCA results for the 12 spectra in class D2A,high, with both spectra 42 (D2A-S-U-800-2461-102-37C) and 31 (D2A-S-U-800-2461-102-37C) showing up as outliers having the largest component 2 and 3 scores respectively. PCA results were computed with the specView utility of NMRPipe, using the region of spectral intensities from  $^1\text{H}$  1.9 ppm to -0.9 ppm,  $^{13}\text{C}$  30.5 ppm to 9.0 ppm. Regions were scaled to uniform maximum intensity, and used for PCA without binning and without centering (subtraction of the average).

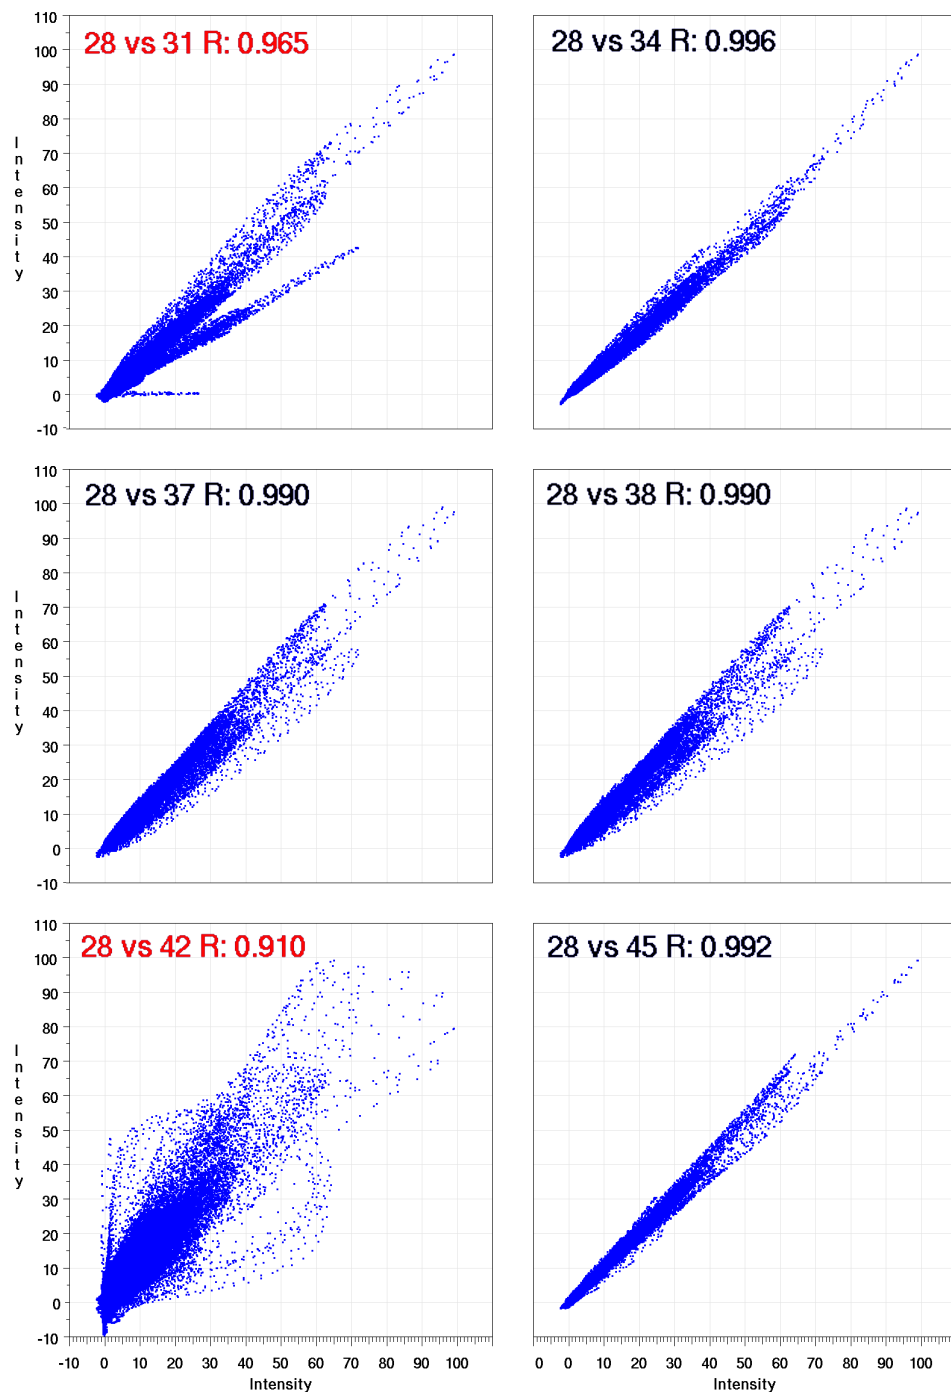

**Supporting Information Figure S4.** Intensity versus intensity correlation plots for representative spectrum 28 (028-D2A-S-U-800-2146-002-37C) versus the other six 800 MHz spectra in the class. Each plot is labeled with the Pearson's correlation value  $R$ . The correlation plot for visually identified outlier spectrum 42 (042-D2A-S-U-800-2461-102-37C) shows extensive systematic deviations, and the lowest correlation coefficient (0.910). Potential outlier spectrum 31 also shows systematic deviations, and the lowest correlation coefficient (0.965) of the remaining pairs of spectra (0.990 to 0.996).

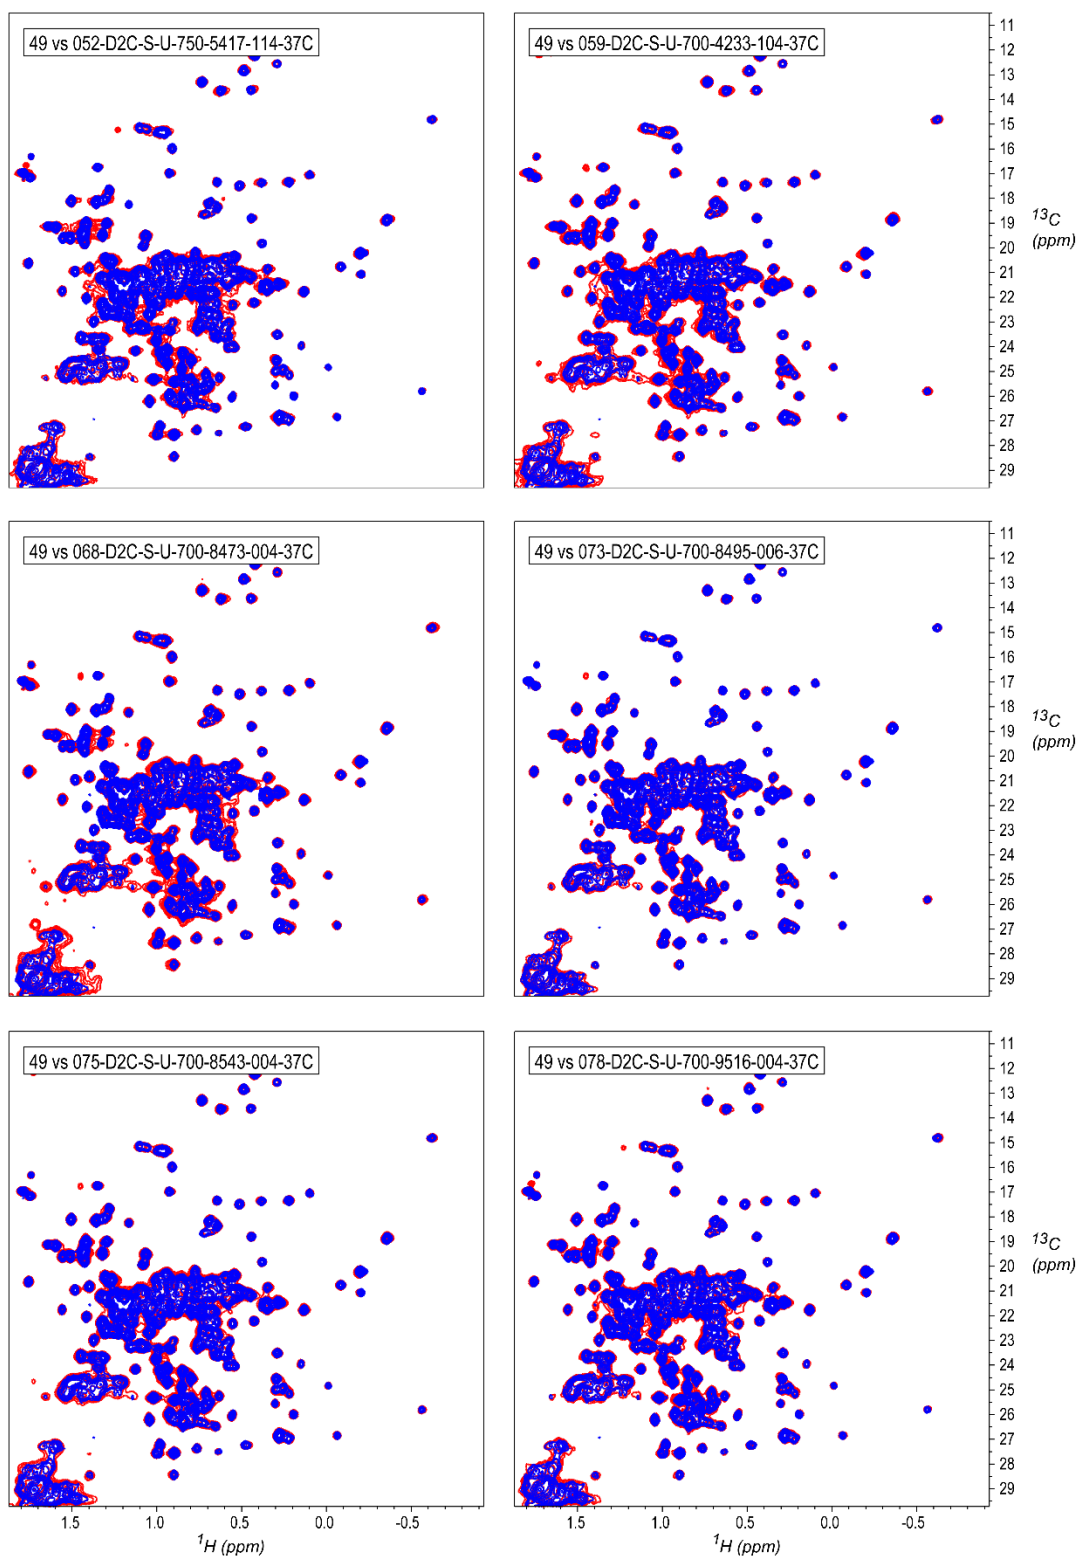

**Supporting Information Figure S5.** Overlays of false positive outlier spectrum 49 (blue), and the other six spectra in its class D2C, mid (red). As shown, the spectra correspond well, indicating that none of them are true outliers. Contour levels start at 2.5% of maximum intensity.
